# Supplementary material for: Dynamic Expression of Interferon Lambda Regulated Genes in Primary Fibroblasts and Immune Organs of the Chicken
Source: MDPI journal article supplement (doi:10.3390/genes10020145), 2019-02-14
Supplement: s1 [file s1]

**A**

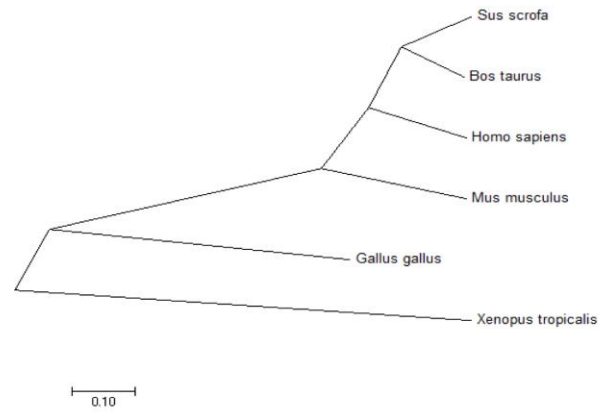

**B**

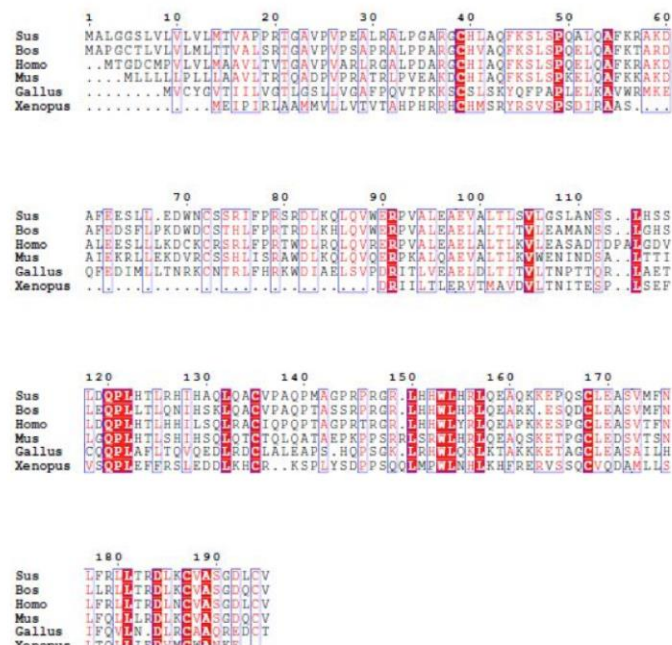

**C**

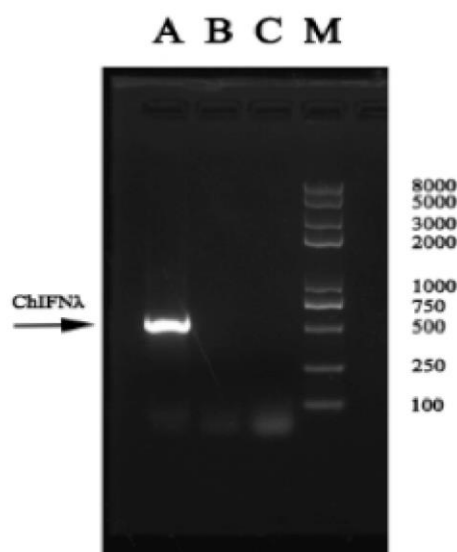

**Supplementary Figure 1: A:** Phylogenetic analysis representing the relationship of chIFN- $\lambda$  with vertebrate IFN- $\lambda$ . The tree was constructed in MEGA 7 by employing neighbor joining method (bootstrap 1000). All gene sequence were acquired from available database (NCBI). *Sus scrofa* (pig) [NP\_001159962.1], *Bos taurus* (cattle) [NP\_001268830.1], *Homo sapiens* (human) [AAN86127.1], *Mus musculus* (mouse), *Gallus gallus* (chicken) [XP\_015144667.1], *Xenopus tropicalis* (frog) [NP\_001165236.1]. **B:** Amino acid sequence of multispecies IFN- $\lambda$  were aligned using ClustalW algorithm. Red color represents conserved sequences. ESPript 3.0 was employed to analyze the sequences. **C:** PCR validation of chIFN- $\lambda$  gene expression. Within C section, A) Expression product chIFN- $\lambda$  cDNA; B) Baculovirus control cDNA; C) Expression product mRNA; M) Marker.

**A**

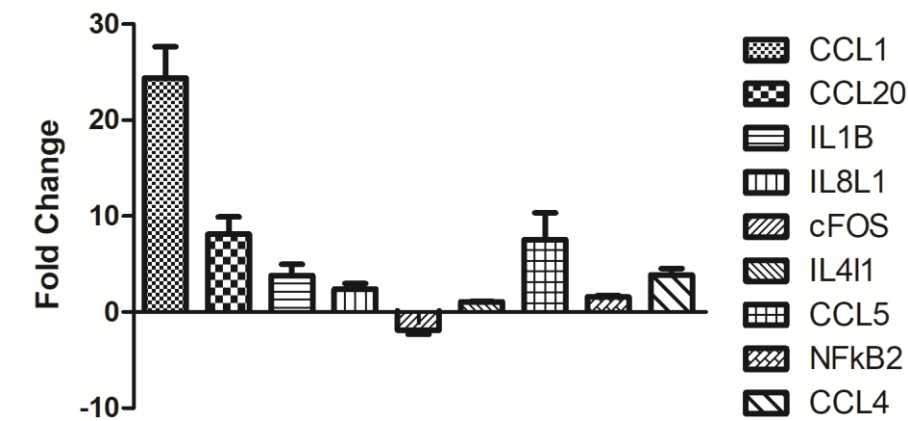

**B**

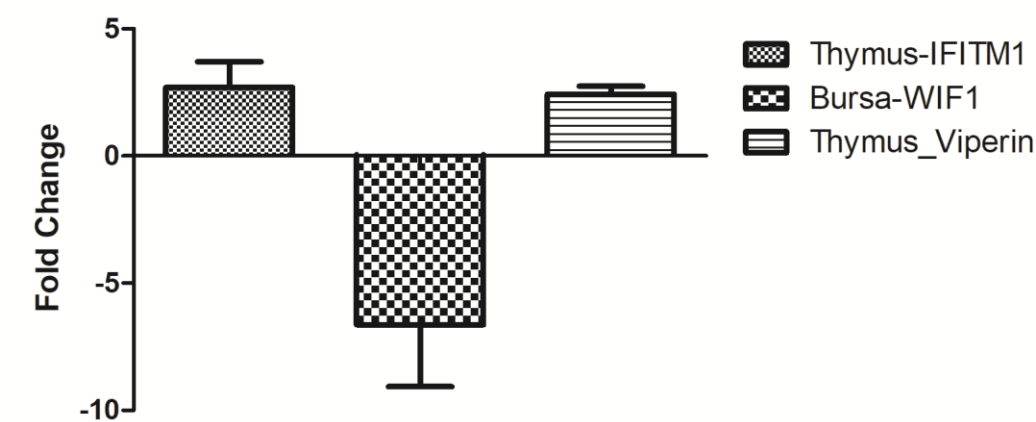

**Supplementary Figure 2: A:** Gene expression in IFN lambda induced CEF and **B:** Gene expression in chicken tissues.
